# Supplementary material
Source: PubMed Central journal article supplement (PMC7509866)

Supplemental Table 1. Univariate Analysis of Selected Clinical Variables and Major Bleeding Events

| Covariate              | OR        | 95% CI     | P-value          |
|------------------------|-----------|------------|------------------|
| <b>ICU status</b>      | 4.18      | 2.37-7.36  | <b>&lt;0.001</b> |
| <b>SRA positivity</b>  | 1.28      | 0.55- 2.99 | 0.564            |
| <b>HIT positive</b>    | 1.27      | 0.62- 2.58 | 0.510            |
| <b>Surgery- CPB</b>    | 1.79      | 1.04- 3.07 | <b>0.036</b>     |
| <b>Surgery- no CPB</b> | .89       | 0.44- 1.78 | 0.739            |
| <b>Sepsis</b>          | 2.89      | 1.64- 5.10 | <b>&lt;0.001</b> |
| <b>Platelet count</b>  |           |            |                  |
| >151                   | Reference | -          | -                |
| 100-150                | 1.44      | 0.44- 4.68 | 0.542            |
| 50-100                 | 1.26      | 0.42- 3.74 | 0.680            |
| <49                    | 3.58      | 1.2- 10.66 | <b>0.022</b>     |

\*9 subjects did not have a platelet count evaluated on day of sGPVI collection and were excluded from analysis of the association of platelet count and bleeding

ICU, intensive care unit; SRA, serotonin release assay; HIT, heparin-induced thrombocytopenia; CPB, cardiopulmonary bypass

Supplemental Figure 1. Receiver-operator curve analysis of sGPVI as a predictor of bleeding events

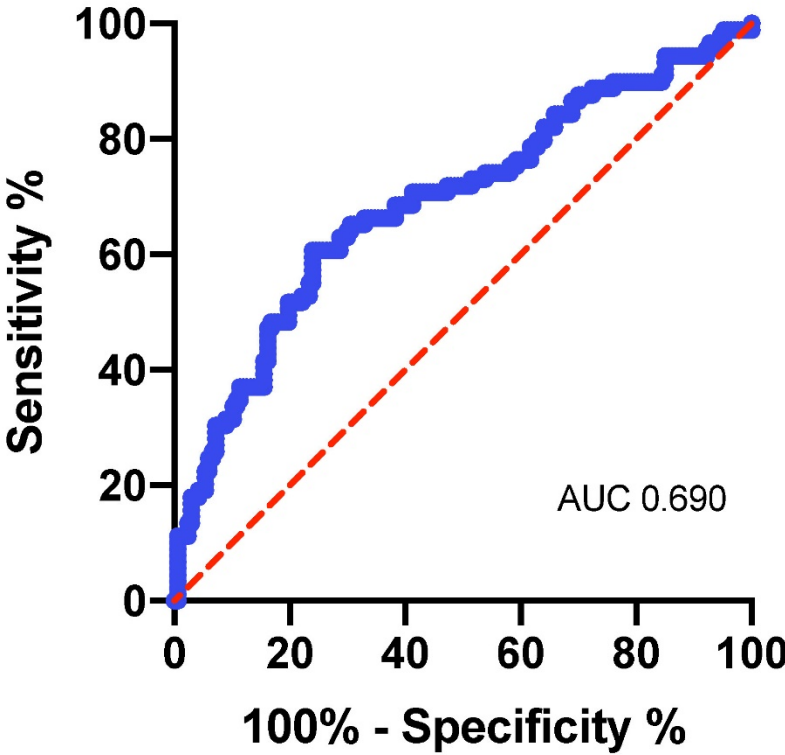

Supplement: advancesADV2020002861-suppl1.pdf [file advancesADV2020002861-suppl1.pdf]
